# Supplementary material for: Lanthanide complexes of 1,3,5-triamino-1,3,5-trideoxy-cis-inositol: evidence for heterotrinuclear species in aqueous solution
Source: Royal Society of Chemistry journal article supplement (doi:10.1039/b105173n), 2002-01-01
Supplement: b105173n.doc [file b105173n.doc]

# Lanthanide complexes of 1,3,5-triamino-1,3,5-trideoxy-*cis*-inositol: evidence for heterotrinuclear species in water solution

David Chapon, Pascale Delangle*, Colette Lebrun

## Supplementary material


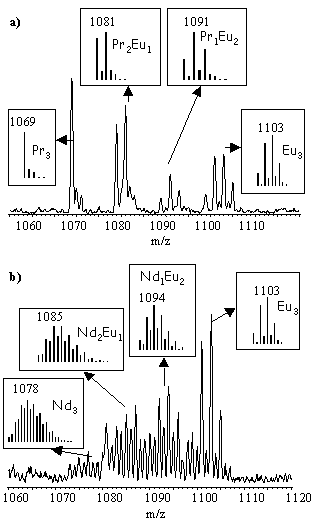


**Figure S1.** ES-MS spectra of samples containing : **a**) Pr(OTf)3, Eu(OTf)3 and TACI (2 / 1 / 2) ; **b)** Nd(OTf)3, Eu(OTf)3 and TACI (1.5 / 1.5 / 2) at pH 8, together with the theoretical isotope distributions of [LnxLn'yL2H-6(OTf)2]+ homo- and heterotrinuclear cations.
